# Supplementary material
Source: PubMed Central journal article supplement (PMC5460932)

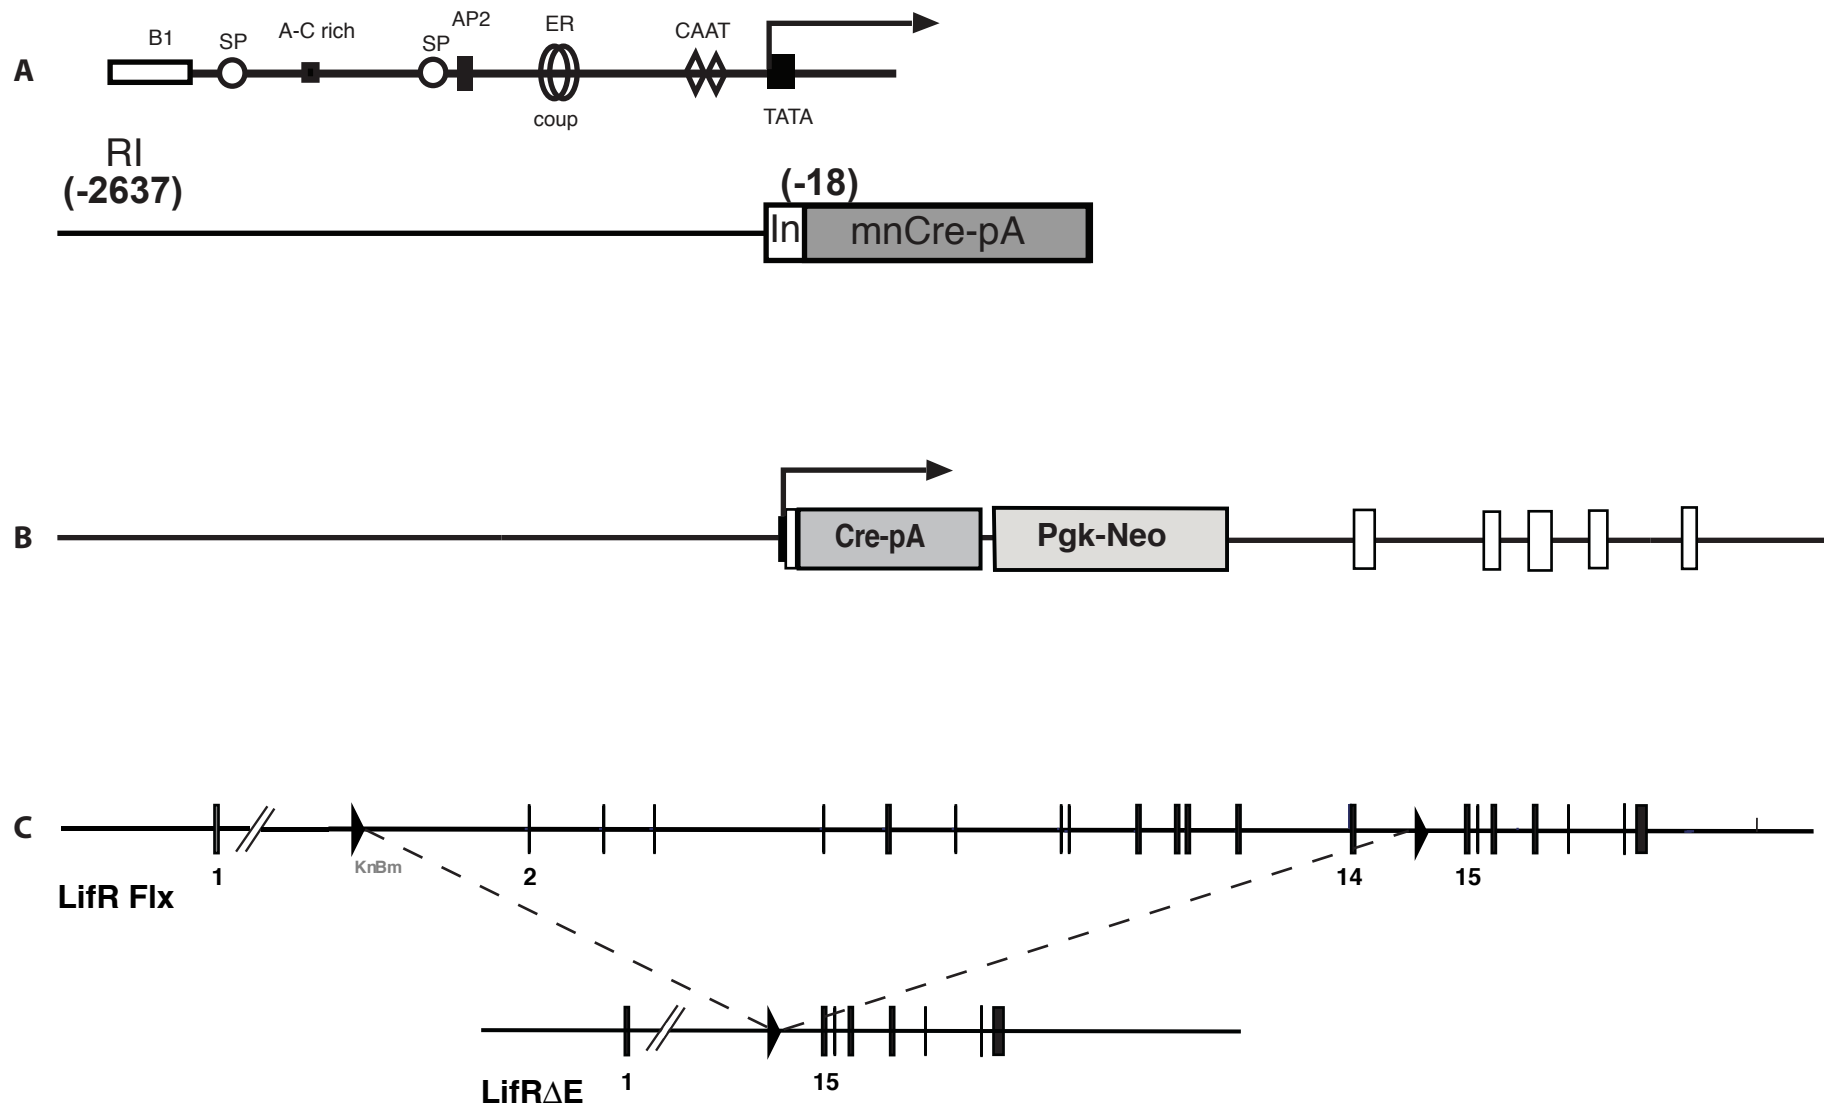

**A**

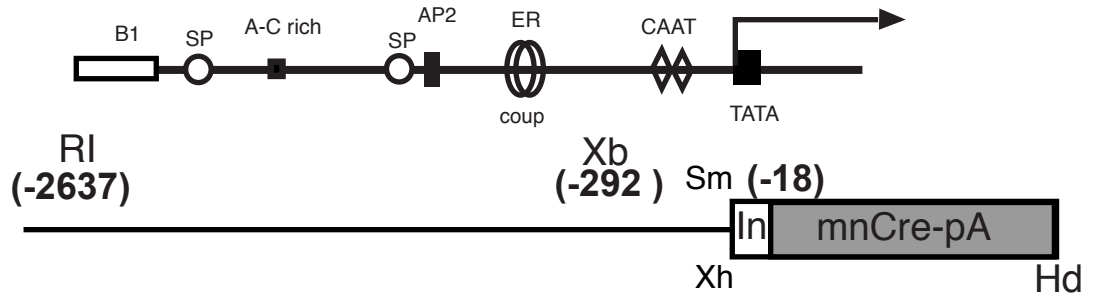

**B**

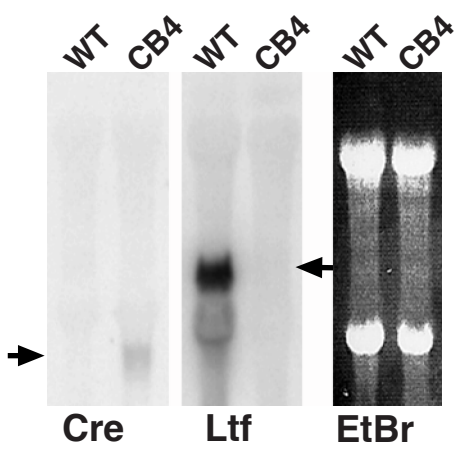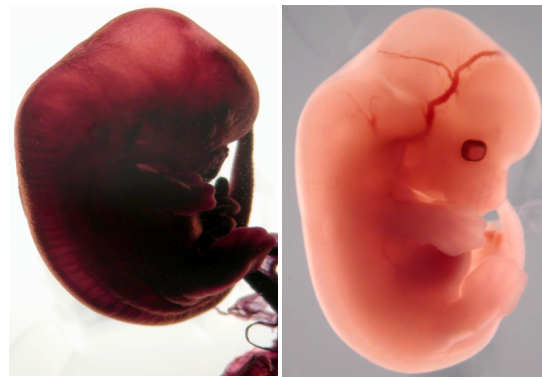

**C**

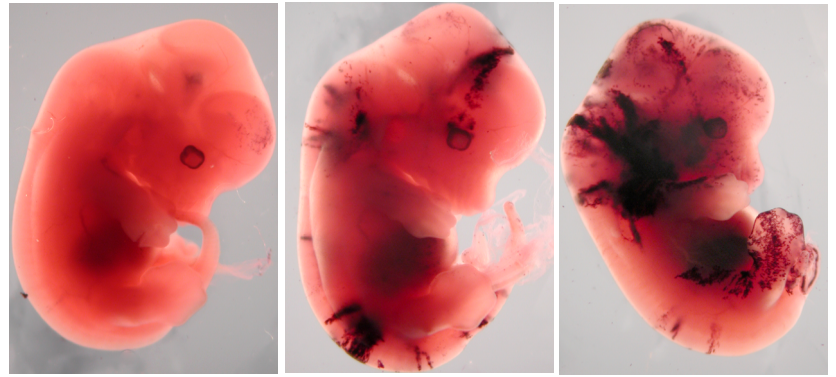

CB4: Z/AP

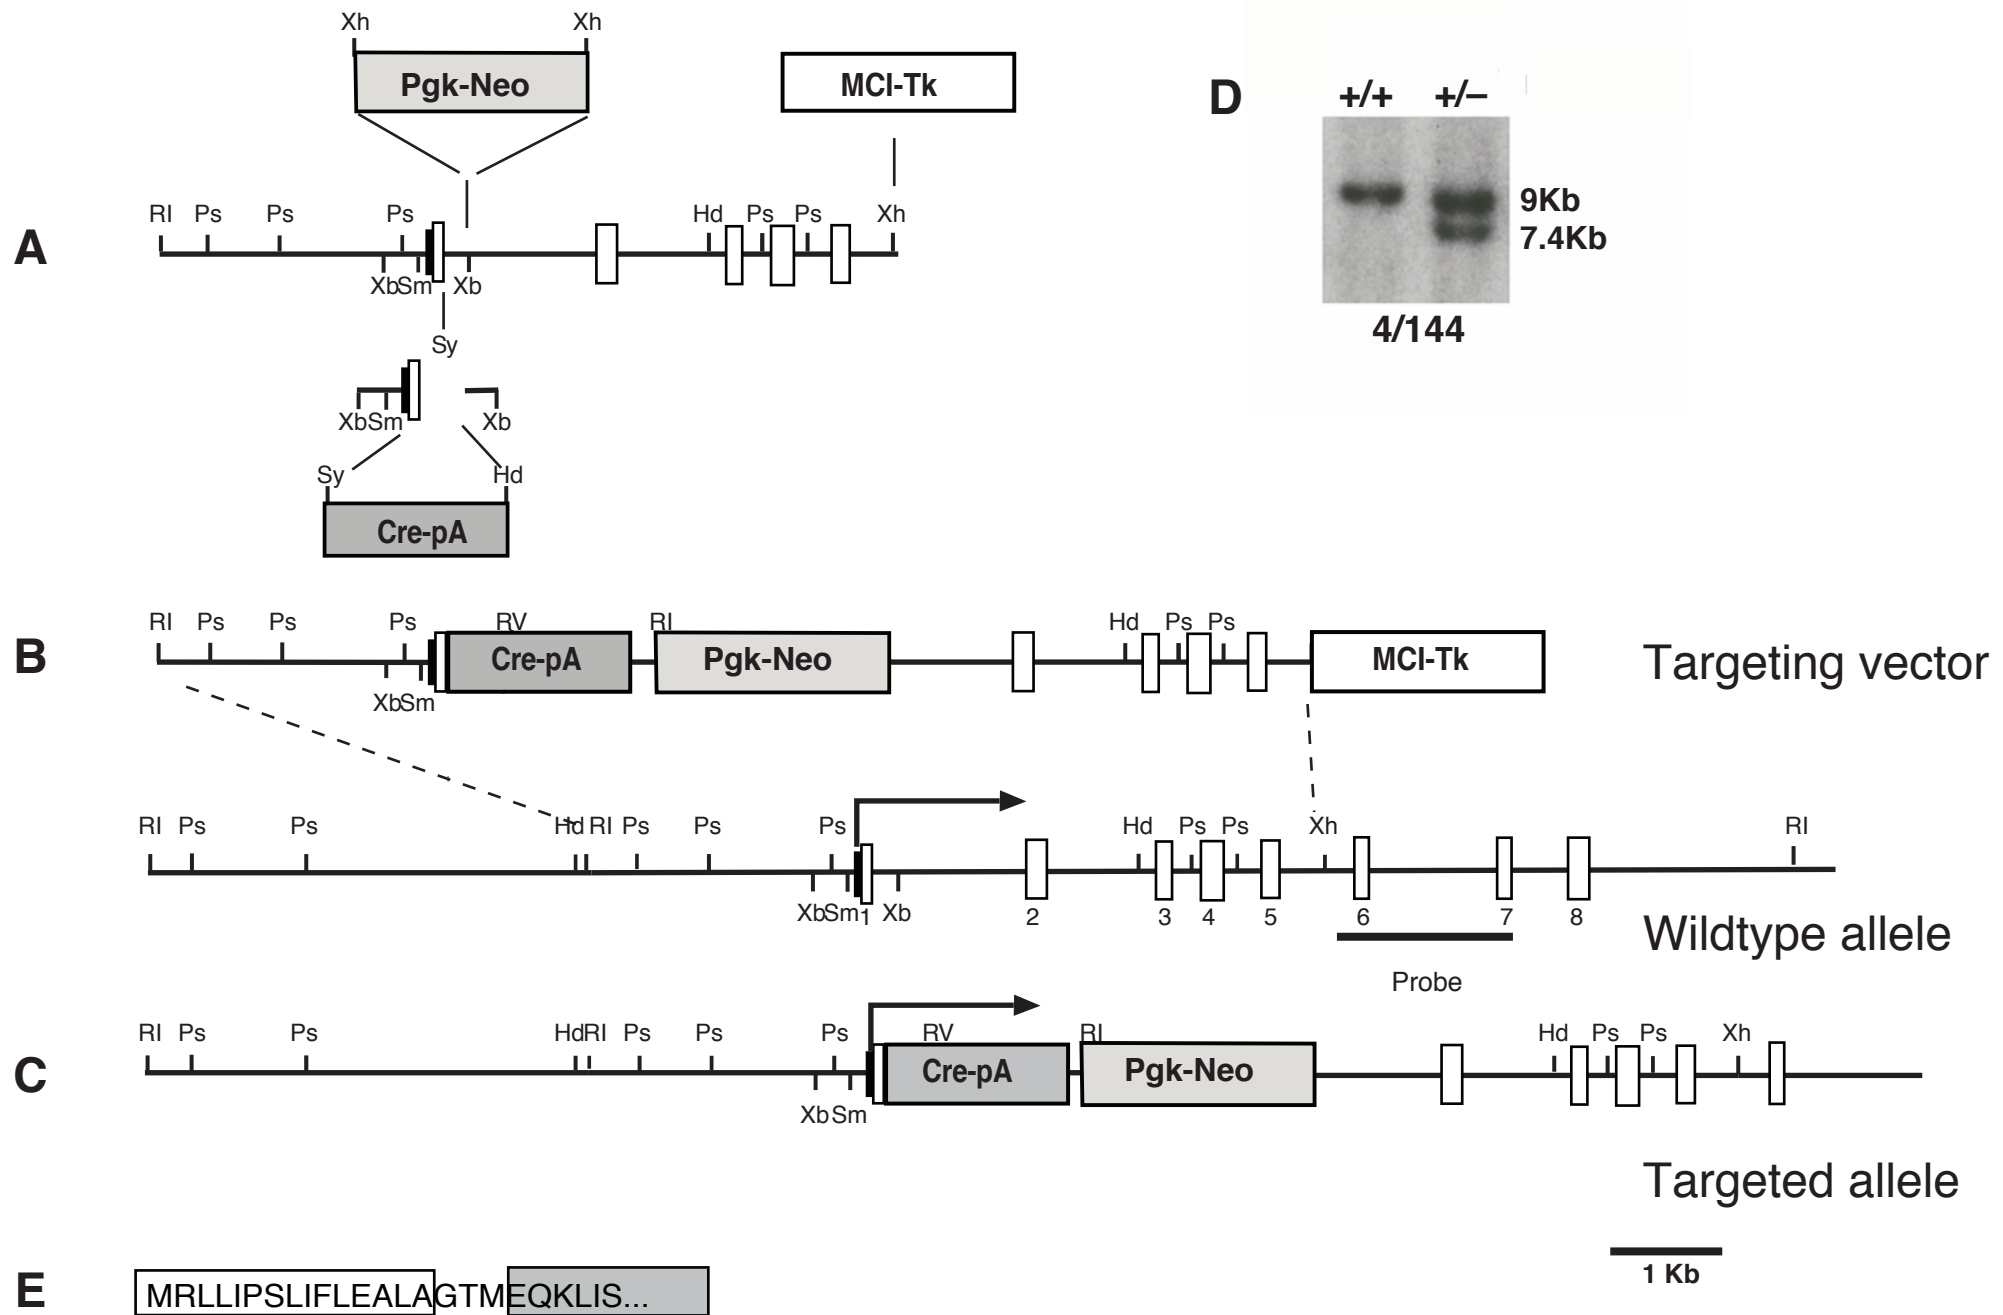

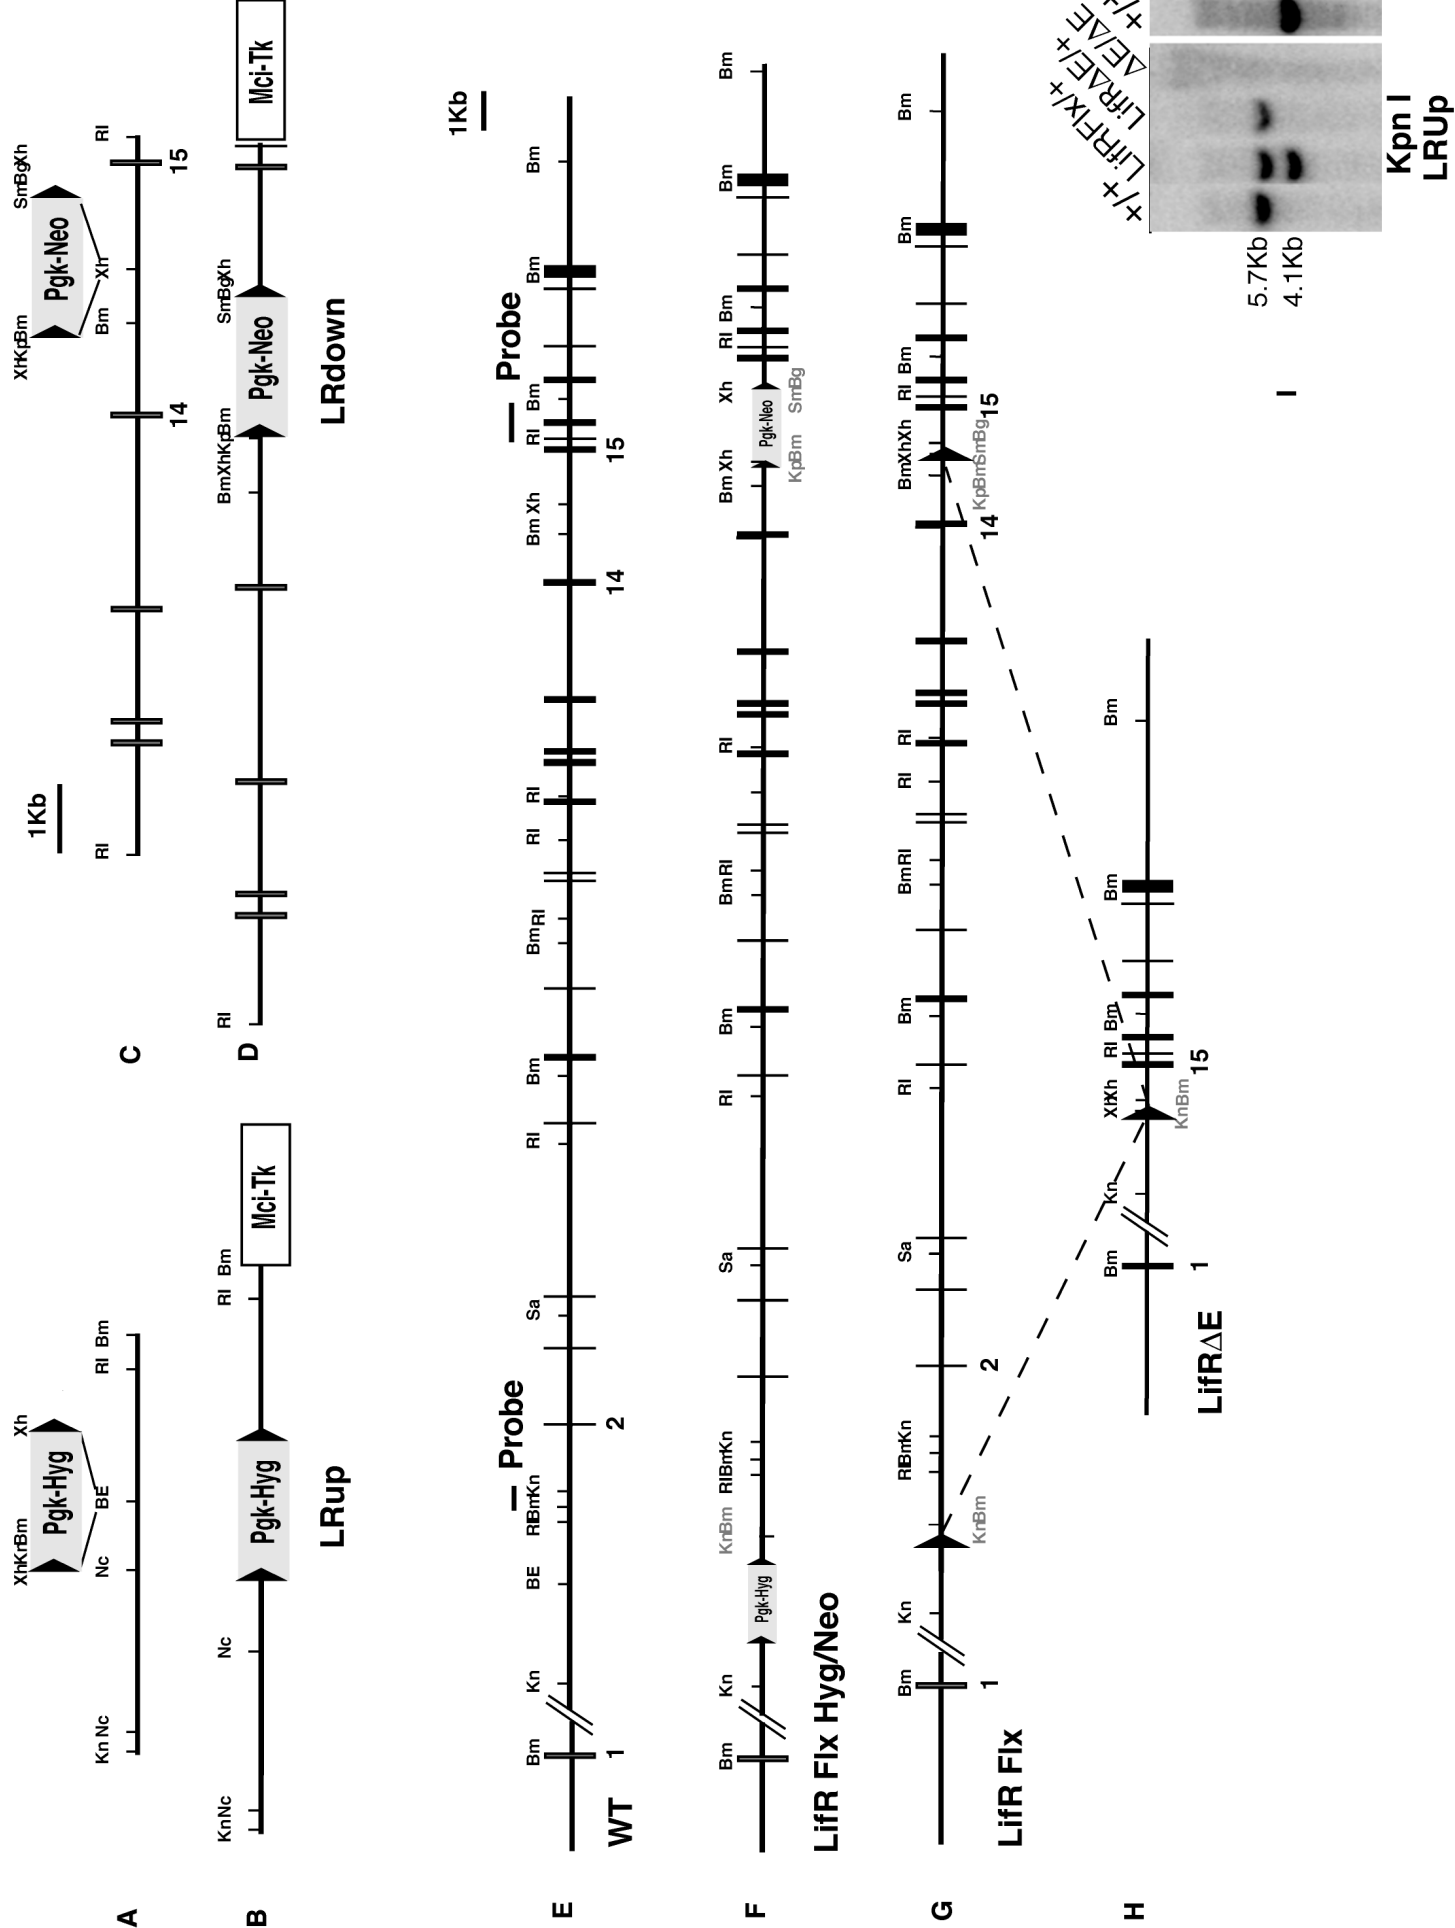

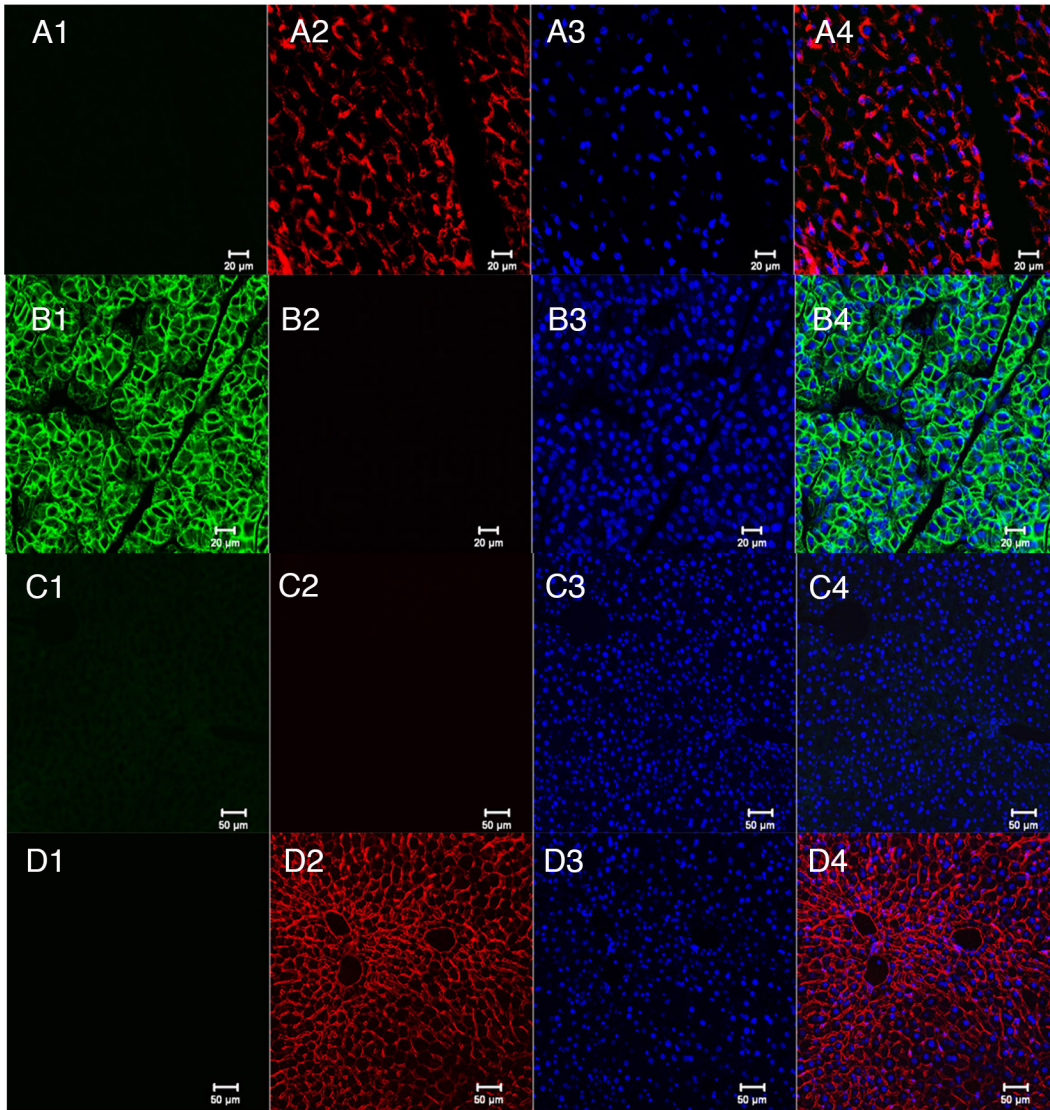



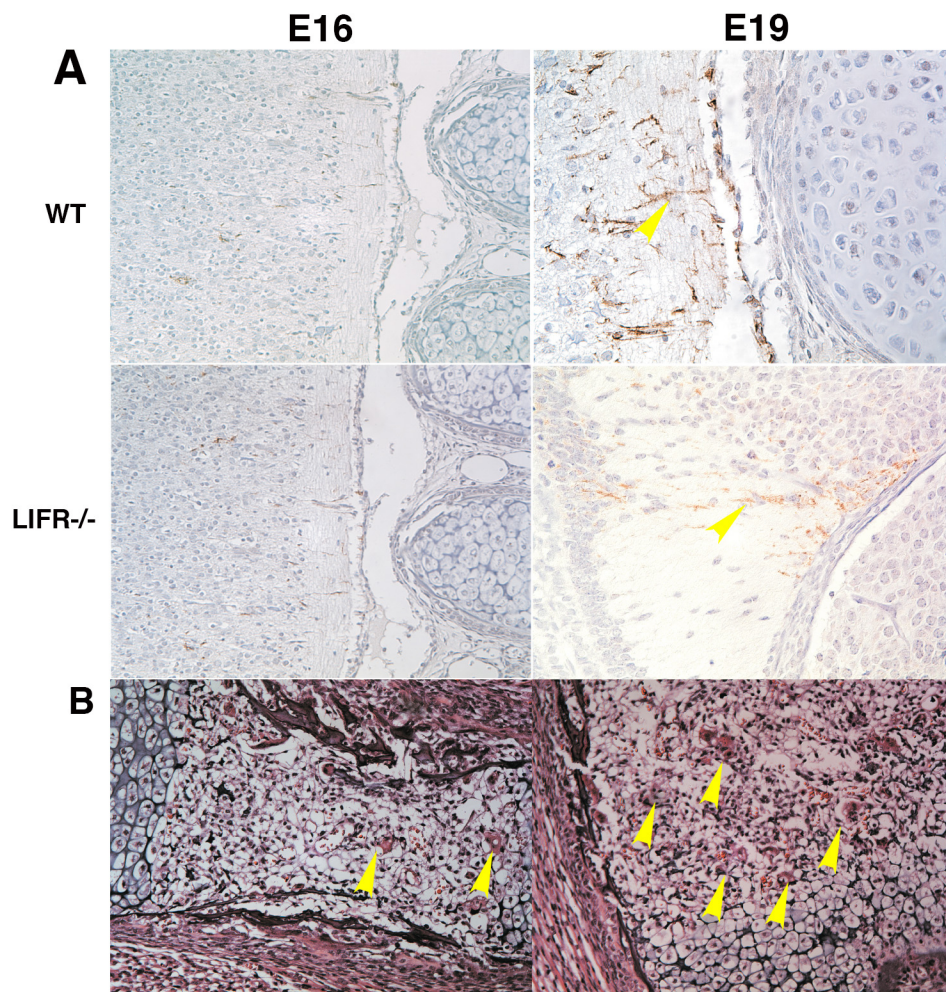

Supplement: en.2017-00103.sf1.pdf [file en.2017-00103.sf1.pdf]
